# Supplementary material for: Controllable construction of core–shell CuCo2S4@polypyrrole nanocomposites as advanced anode materials for high-performance sodium ion half/full batteries
Source: Royal Society of Chemistry journal article supplement (doi:10.1039/d0qm00599a), 2020-09-22
Supplement: d0qm00599a1.pdf [file d0qm00599a1.pdf]

## Supporting Information

### **Controllable construction of core-shell $\text{CuCo}_2\text{S}_4$ @polypyrrole nanocomposites as advanced anode for high-performance sodium ion half/full batteries**

Qun Li,<sup>a</sup> Qingze Jiao,<sup>a,c</sup> Wei Zhou,<sup>b</sup> Xueting Feng,<sup>a</sup> Quan Shi,<sup>a</sup> Zheng Dai,<sup>a</sup> Tingting Gu,<sup>a</sup> Yun Zhao,<sup>a</sup> Hansheng Li,<sup>a</sup> and Caihong Feng <sup>\*a</sup>

<sup>a</sup> School of Chemistry and Chemical Engineering, Beijing Institute of Technology, Beijing 100081, China.

<sup>b</sup> School of Chemistry, Beijing Advanced Innovation Centre for Biomedical Engineering, Beihang University, Beijing 100191, China

<sup>c</sup> School of Materials and Environment, Beijing Institute of Technology, Zhuhai, Zhuhai 519085, China.

\*Corresponding author.

Email: fengch@bit.edu.cn (Caihong Feng)

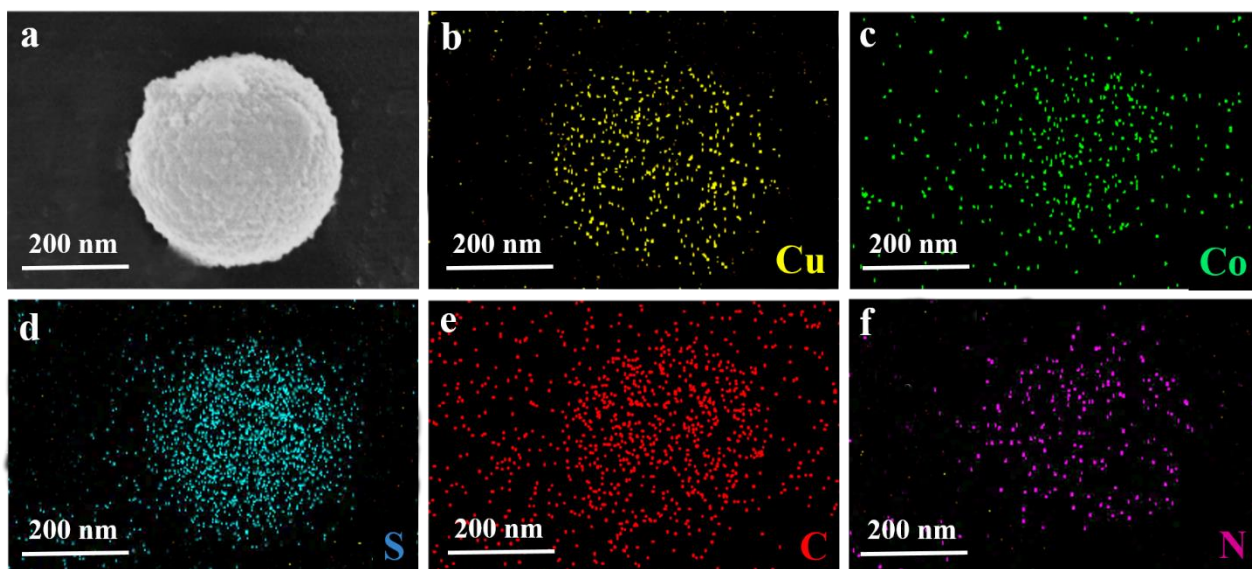

**Fig. S1** EDS mappings of an individual CS-CuCo<sub>2</sub>S<sub>4</sub>@PPy. (a) SEM image of CS-CuCo<sub>2</sub>S<sub>4</sub>@PPy, (b) Cu, (c) Co, (d) S, (e) C and (f) N.

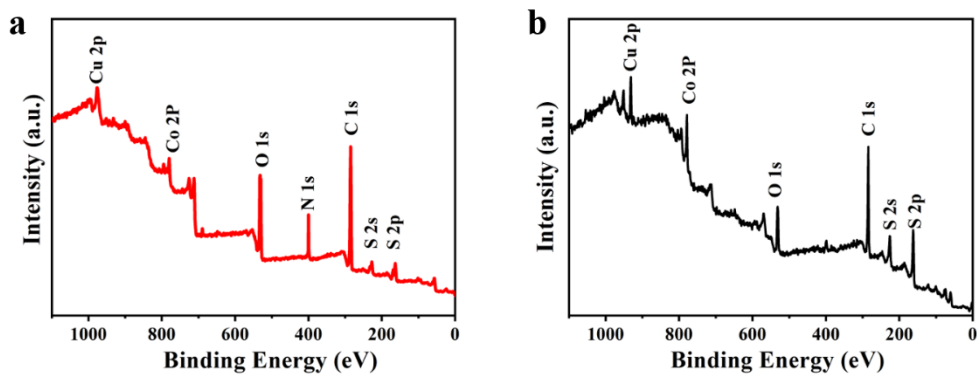

**Fig. S2** XPS survey spectrum of as-prepared samples, (a) CS-CuCo<sub>2</sub>S<sub>4</sub>@PPy, (b) pure CuCo<sub>2</sub>S<sub>4</sub>.

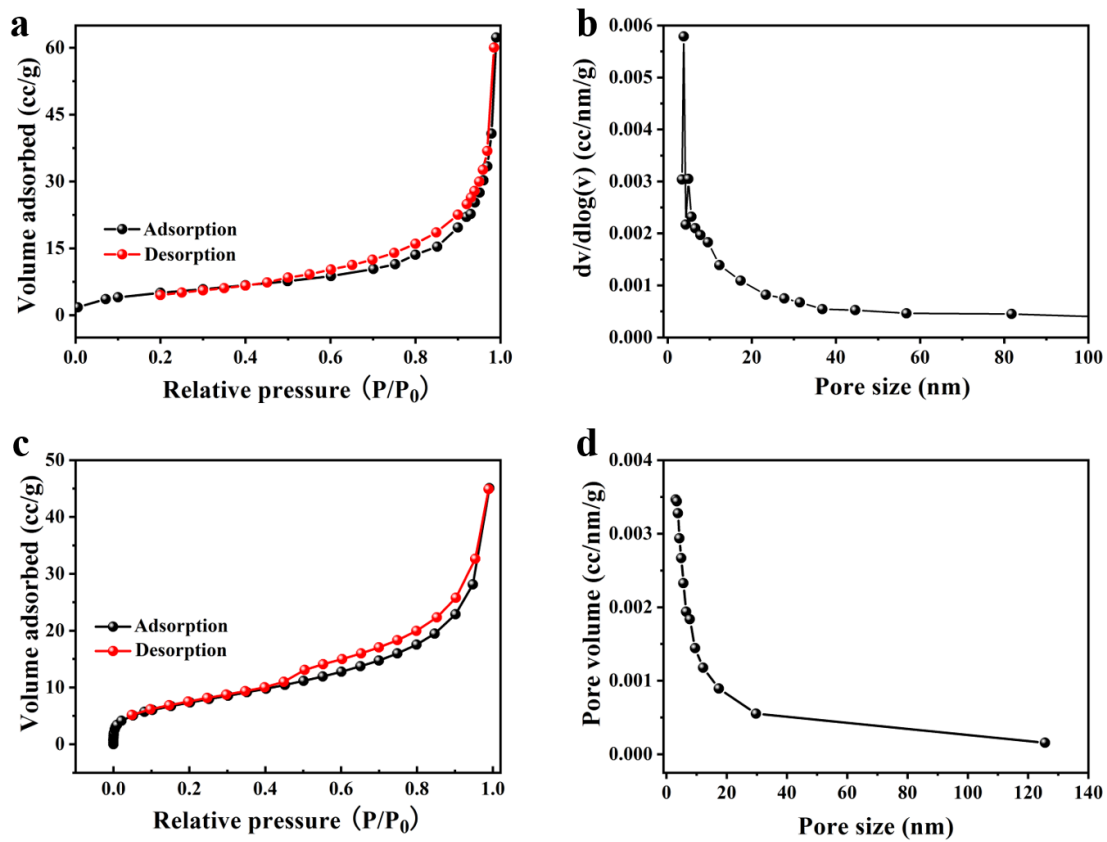

**Fig. S3** Nitrogen adsorption-desorption isotherms and pore size distribution curves of CS-CuCo<sub>2</sub>S<sub>4</sub>@PPy (a-b) and pure CuCo<sub>2</sub>S<sub>4</sub> (c-d)

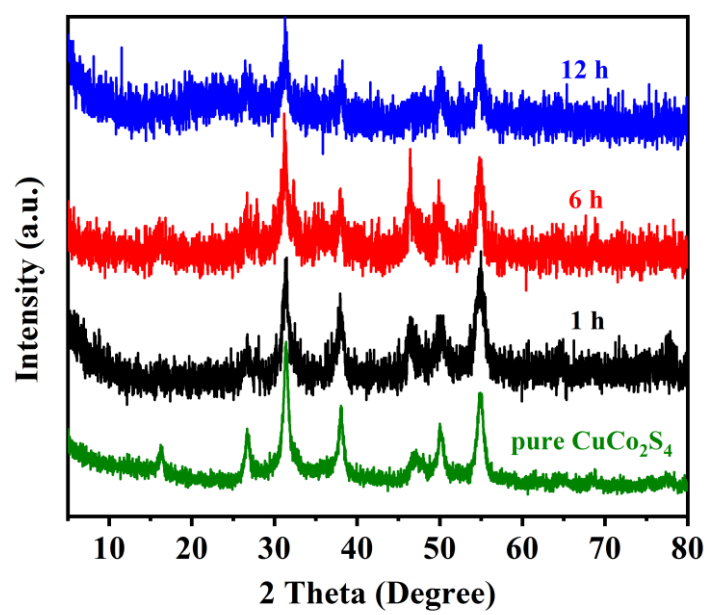

**Fig. S4** XRD pattern of as-prepared samples with different polymerization time ranging from 1 h to 12 h.

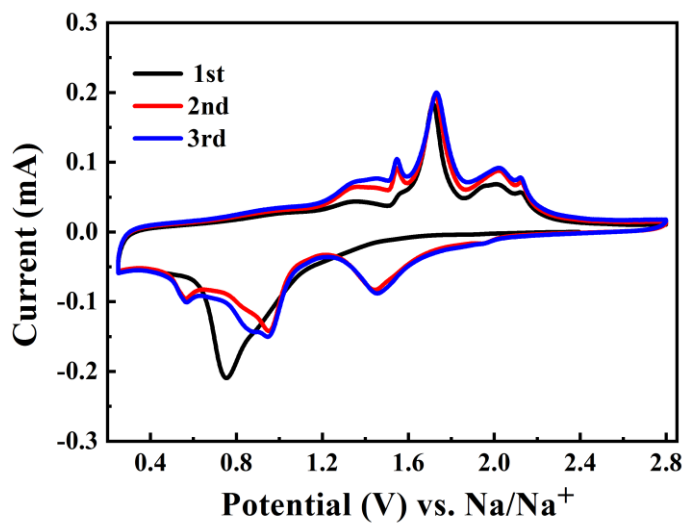

**Fig. S5** CV curves of pure  $\text{CuCo}_2\text{S}_4$  at a sweep rate of  $0.1 \text{ mV/s}$ .

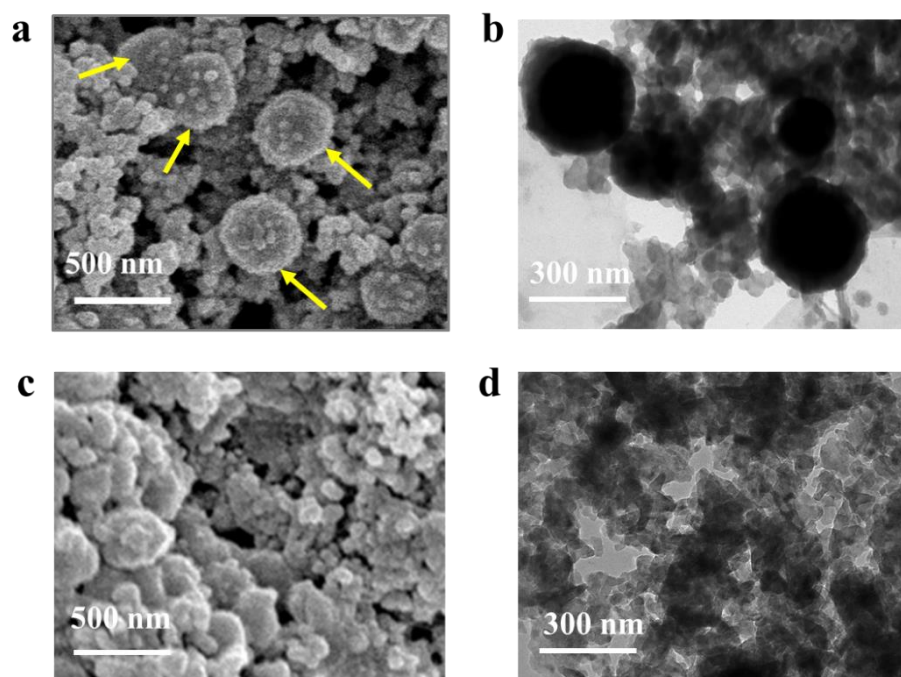

**Fig. S6** SEM and TEM images of CS-CuCo<sub>2</sub>S<sub>4</sub>@PPy after 2000 cycles at 2 A g<sup>-1</sup> (a-b) and pure CuCo<sub>2</sub>S<sub>4</sub> after 500 cycles at 2 A g<sup>-1</sup> (c-d).

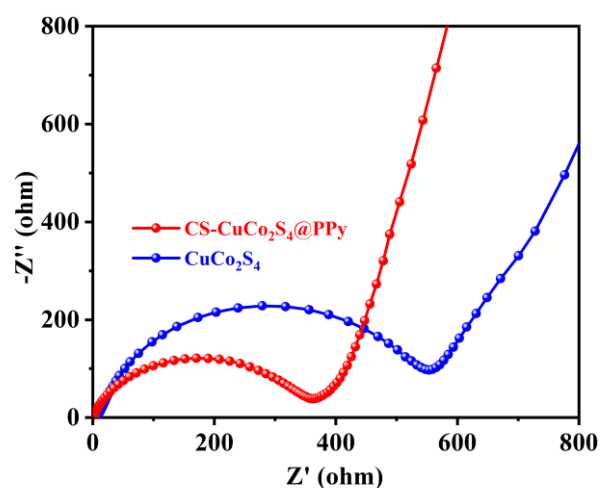

**Fig. S7** The initial EIS curves of half cell for CS-CuCo<sub>2</sub>S<sub>4</sub>@PPy and pure CuCo<sub>2</sub>S<sub>4</sub>.

As shown in Fig. S7, the charge-transfer resistance and the sodium ion diffusion resistance of CS-CuCo<sub>2</sub>S<sub>4</sub>@PPy in the initial curve are smaller than that of pure CuCo<sub>2</sub>S<sub>4</sub>, illustrating the CS-CuCo<sub>2</sub>S<sub>4</sub>@PPy possesses faster electrochemical reaction kinetics.



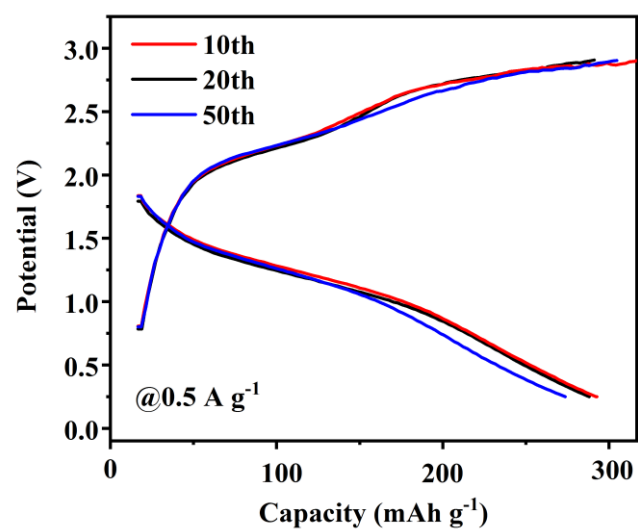

**Fig. S8** The charge/discharge curves of full cell at  $0.5 \text{ A g}^{-1}$  with a potential window of 0.25-3.0 V.
